# Supplementary material for: Lead Isotopes and the Sources of Granitic Magmas: The Sveconorwegian Granite and Pegmatite Province of Southern Norway
Source: MDPI journal article supplement (doi:10.3390/min12070878), 2022-07-12
Supplement: s1 [file s1]

## Supplementary Material.

**Table S1.** Radiogenic isotope data of K-feldspars from Sveconorwegian pegmatites and granites.

| Sample   | Locality          | $^{206}\text{Pb}/^{204}\text{Pb}$ | 1 SE   | $^{207}\text{Pb}/^{206}\text{Pb}$ | 1SE    | $^{208}\text{Pb}/^{204}\text{Pb}$ | 1SE    |
|----------|-------------------|-----------------------------------|--------|-----------------------------------|--------|-----------------------------------|--------|
| 2109402  | Lille Kleivmyr    | 17.3794                           | 0.0016 | 15.5204                           | 0.0017 | 36.6730                           | 0.0056 |
|          |                   | 17.3853                           | 0.0018 | 15.5192                           | 0.0019 | 36.6745                           | 0.0052 |
|          |                   | 17.3867                           | 0.0020 | 15.5208                           | 0.0020 | 36.6784                           | 0.0056 |
|          |                   | 17.3798                           | 0.0027 | 15.5213                           | 0.0022 | 36.6738                           | 0.0068 |
|          |                   | 17.3786                           | 0.0018 | 15.5222                           | 0.0021 | 36.6886                           | 0.0061 |
|          |                   | 17.3754                           | 0.0020 | 15.5180                           | 0.0025 | 36.6678                           | 0.0073 |
|          |                   | 17.3812                           | 0.0014 | 15.5191                           | 0.0016 | 36.6743                           | 0.0049 |
|          |                   | 17.3753                           | 0.0018 | 15.5200                           | 0.0019 | 36.6716                           | 0.0059 |
|          |                   | 17.3772                           | 0.0018 | 15.5231                           | 0.0020 | 36.6830                           | 0.0063 |
|          |                   | 17.3761                           | 0.0015 | 15.5200                           | 0.0017 | 36.6750                           | 0.0048 |
| 2009407  | Sønnristjern      | 17.3524                           | 0.0040 | 15.5151                           | 0.0030 | 36.6076                           | 0.0100 |
|          |                   | 17.3204                           | 0.0025 | 15.5104                           | 0.0029 | 36.6002                           | 0.0078 |
|          |                   | 17.3215                           | 0.0024 | 15.5115                           | 0.0020 | 36.6070                           | 0.0047 |
|          |                   | 17.3134                           | 0.0029 | 15.5084                           | 0.0029 | 36.5940                           | 0.0089 |
|          |                   | 17.3095                           | 0.0038 | 15.5086                           | 0.0045 | 36.5904                           | 0.0140 |
|          |                   | 17.3173                           | 0.0024 | 15.5054                           | 0.0031 | 36.5840                           | 0.0096 |
|          |                   | 17.3286                           | 0.0030 | 15.5158                           | 0.0034 | 36.6096                           | 0.0099 |
|          |                   | 17.3175                           | 0.0026 | 15.5076                           | 0.0029 | 36.5821                           | 0.0091 |
|          |                   | 17.3202                           | 0.0018 | 15.5140                           | 0.0021 | 36.6097                           | 0.0068 |
|          |                   | 17.3207                           | 0.0021 | 15.5138                           | 0.0024 | 36.6088                           | 0.0073 |
| 26051712 | Herrefoss granite | 17.0760                           | 0.0089 | 15.4694                           | 0.0080 | 36.5764                           | 0.0250 |
|          |                   | 17.0624                           | 0.0120 | 15.4724                           | 0.0150 | 36.5501                           | 0.0530 |
|          |                   | 17.0555                           | 0.0120 | 15.4610                           | 0.0140 | 36.5599                           | 0.0390 |
| 59295    | Solås             | 17.3606                           | 0.0025 | 15.5032                           | 0.0017 | 36.6843                           | 0.0041 |
|          |                   | 17.3918                           | 0.0028 | 15.5117                           | 0.0018 | 36.7047                           | 0.0045 |
|          |                   | 17.3914                           | 0.0028 | 15.5132                           | 0.0020 | 36.7102                           | 0.0048 |
|          |                   | 17.4109                           | 0.0034 | 15.5095                           | 0.0019 | 36.7060                           | 0.0048 |
|          |                   | 17.4463                           | 0.0110 | 15.5122                           | 0.0023 | 36.7214                           | 0.0074 |
|          |                   | 17.3591                           | 0.0024 | 15.5054                           | 0.0022 | 36.6905                           | 0.0053 |
|          |                   | 17.4412                           | 0.0071 | 15.5081                           | 0.0013 | 36.6949                           | 0.0029 |
|          |                   | 17.3675                           | 0.0027 | 15.4987                           | 0.0029 | 36.6709                           | 0.0071 |
|          |                   | 17.3662                           | 0.0025 | 15.5064                           | 0.0021 | 36.6935                           | 0.0043 |
|          |                   | 17.3634                           | 0.0015 | 15.5069                           | 0.0017 | 36.6917                           | 0.0043 |
| 09070819 | Solås             | 17.3279                           | 0.0033 | 15.5151                           | 0.0046 | 36.7239                           | 0.0140 |
|          |                   | 17.3397                           | 0.0044 | 15.5154                           | 0.0031 | 36.7234                           | 0.0096 |
|          |                   | 17.3144                           | 0.0033 | 15.5073                           | 0.0046 | 36.6959                           | 0.0140 |
|          |                   | 17.3394                           | 0.0039 | 15.5192                           | 0.0039 | 36.7401                           | 0.0120 |
|          |                   | 17.3645                           | 0.0037 | 15.5200                           | 0.0031 | 36.7361                           | 0.0096 |
|          |                   | 17.4241                           | 0.0055 | 15.5240                           | 0.0050 | 36.7594                           | 0.0160 |
|          |                   | 17.3878                           | 0.0110 | 15.5346                           | 0.0035 | 36.7815                           | 0.0097 |
|          |                   | 17.3375                           | 0.0039 | 15.5303                           | 0.0042 | 36.7760                           | 0.0120 |
|          |                   | 17.3489                           | 0.0040 | 15.5199                           | 0.0045 | 36.7384                           | 0.0140 |
|          |                   | 17.3276                           | 0.0039 | 15.5156                           | 0.0058 | 36.7297                           | 0.0180 |
| 12070802 | Landsverk 1       | 17.1371                           | 0.0011 | 15.4889                           | 0.0011 | 36.5104                           | 0.0029 |
|          |                   | 17.1376                           | 0.0013 | 15.4888                           | 0.0015 | 36.5101                           | 0.0045 |
|          |                   | 17.1355                           | 0.0010 | 15.4865                           | 0.0012 | 36.5028                           | 0.0034 |
|          |                   | 17.1392                           | 0.0010 | 15.4905                           | 0.0012 | 36.5132                           | 0.0034 |
|          |                   | 17.1334                           | 0.0008 | 15.4833                           | 0.0011 | 36.4944                           | 0.0028 |
|          |                   | 17.1375                           | 0.0015 | 15.4901                           | 0.0016 | 36.5139                           | 0.0043 |
|          |                   | 17.1362                           | 0.0009 | 15.4884                           | 0.0010 | 36.5087                           | 0.0031 |
|          |                   | 17.1374                           | 0.0007 | 15.4916                           | 0.0007 | 36.5163                           | 0.0026 |
|          |                   | 17.1372                           | 0.0008 | 15.4891                           | 0.0010 | 36.5084                           | 0.0028 |
|          |                   | 17.1357                           | 0.0008 | 15.4891                           | 0.0011 | 36.5108                           | 0.0032 |
| 07070802 | Steli             | 17.5506                           | 0.0021 | 15.5378                           | 0.0023 | 36.8199                           | 0.0069 |

|          |                          |         |        |         |        |         |        |
|----------|--------------------------|---------|--------|---------|--------|---------|--------|
|          |                          | 17.5603 | 0.0027 | 15.5305 | 0.0021 | 36.7965 | 0.0062 |
|          |                          | 17.6333 | 0.0093 | 15.5389 | 0.0063 | 36.8244 | 0.0210 |
|          |                          | 17.5371 | 0.0024 | 15.5250 | 0.0025 | 36.7833 | 0.0071 |
|          |                          | 17.5588 | 0.0023 | 15.5288 | 0.0024 | 36.7959 | 0.0065 |
|          |                          | 17.5723 | 0.0068 | 15.5365 | 0.0028 | 36.8140 | 0.0080 |
|          |                          | 17.5681 | 0.0026 | 15.5307 | 0.0026 | 36.7992 | 0.0078 |
|          |                          | 17.5590 | 0.0029 | 15.5396 | 0.0026 | 36.8256 | 0.0078 |
|          |                          | 17.5425 | 0.0018 | 15.5324 | 0.0021 | 36.8022 | 0.0060 |
|          |                          | 17.5506 | 0.0023 | 15.5437 | 0.0025 | 36.8392 | 0.0078 |
| 22051701 | Høvringvatnet<br>granite | 16.6233 | 0.0085 | 15.4447 | 0.0130 | 36.3234 | 0.0390 |
|          |                          | 16.6393 | 0.0084 | 15.4773 | 0.0120 | 36.3950 | 0.0360 |
|          |                          | 16.6988 | 0.0180 | 15.4380 | 0.0140 | 36.2902 | 0.0430 |
|          |                          | 16.5733 | 0.0088 | 15.3900 | 0.0120 | 36.1570 | 0.0420 |
|          |                          | 16.6514 | 0.0096 | 15.4789 | 0.0120 | 36.4225 | 0.0380 |
| 14101602 | Herrebøkasa              | 16.9063 | 0.0034 | 15.4865 | 0.0035 | 36.7592 | 0.0098 |
|          |                          | 16.8979 | 0.0027 | 15.4768 | 0.0029 | 36.7260 | 0.0083 |
|          |                          | 16.9076 | 0.0023 | 15.4913 | 0.0029 | 36.7686 | 0.0087 |
|          |                          | 16.9188 | 0.0025 | 15.4899 | 0.0031 | 36.7648 | 0.0092 |
|          |                          | 16.9107 | 0.0033 | 15.4876 | 0.0041 | 36.7533 | 0.0110 |
|          |                          | 16.9054 | 0.0028 | 15.4882 | 0.0034 | 36.7595 | 0.0100 |
|          |                          | 16.9053 | 0.0036 | 15.4780 | 0.0033 | 36.7325 | 0.0100 |
|          |                          | 16.9021 | 0.0026 | 15.4859 | 0.0032 | 36.7572 | 0.0089 |
|          |                          | 16.9033 | 0.0034 | 15.4854 | 0.0038 | 36.7531 | 0.0110 |
|          |                          | 16.9211 | 0.0024 | 15.4927 | 0.0020 | 36.7711 | 0.0056 |
| 14101610 | Idefjord granite         | 16.9646 | 0.0092 | 15.4879 | 0.0100 | 36.7280 | 0.0330 |
|          |                          | 16.9678 | 0.0130 | 15.4839 | 0.0150 | 36.7147 | 0.0420 |
|          |                          | 16.9290 | 0.0078 | 15.4854 | 0.0094 | 36.7056 | 0.0300 |
|          |                          | 16.9468 | 0.0089 | 15.5057 | 0.0082 | 36.7717 | 0.0230 |
|          |                          | 16.9681 | 0.0087 | 15.5099 | 0.0084 | 36.7916 | 0.0250 |
|          |                          | 16.9769 | 0.0120 | 15.4801 | 0.0120 | 36.7056 | 0.0370 |
|          |                          | 16.9446 | 0.0080 | 15.5009 | 0.0098 | 36.7529 | 0.0310 |
|          |                          | 16.9292 | 0.0073 | 15.4846 | 0.0094 | 36.7232 | 0.0260 |
|          |                          | 17.0561 | 0.0088 | 15.4863 | 0.0092 | 36.7364 | 0.0270 |
| 07061607 | Kleppe quarry            | 17.2681 | 0.0015 | 15.5054 | 0.0016 | 36.7120 | 0.0042 |
|          |                          | 17.2662 | 0.0017 | 15.5043 | 0.0016 | 36.7108 | 0.0047 |
|          |                          | 17.2638 | 0.0011 | 15.5010 | 0.0014 | 36.6991 | 0.0039 |
|          |                          | 17.2668 | 0.0016 | 15.5036 | 0.0018 | 36.7057 | 0.0052 |
|          |                          | 17.2680 | 0.0013 | 15.5022 | 0.0016 | 36.7007 | 0.0047 |
|          |                          | 17.2663 | 0.0017 | 15.5019 | 0.0017 | 36.6995 | 0.0052 |
|          |                          | 17.2657 | 0.0013 | 15.5016 | 0.0018 | 36.6999 | 0.0049 |
|          |                          | 17.2665 | 0.0014 | 15.5049 | 0.0016 | 36.7075 | 0.0048 |
|          |                          | 17.2644 | 0.0015 | 15.5004 | 0.0018 | 36.6949 | 0.0050 |
|          |                          | 17.2637 | 0.0012 | 15.5007 | 0.0016 | 36.6994 | 0.0047 |
| 05061610 | Svåheii 3                | 17.3020 | 0.0022 | 15.5026 | 0.0018 | 36.7459 | 0.0046 |
|          |                          | 17.3125 | 0.0018 | 15.5117 | 0.0018 | 36.7649 | 0.0038 |
|          |                          | 17.3097 | 0.0014 | 15.5091 | 0.0013 | 36.7608 | 0.0033 |
|          |                          | 17.3072 | 0.0019 | 15.5073 | 0.0018 | 36.7546 | 0.0044 |
|          |                          | 17.3088 | 0.0017 | 15.5090 | 0.0015 | 36.7585 | 0.0035 |
|          |                          | 17.3083 | 0.0014 | 15.5085 | 0.0013 | 36.7563 | 0.0033 |
|          |                          | 17.3000 | 0.0016 | 15.5016 | 0.0016 | 36.7377 | 0.0041 |
|          |                          | 17.2995 | 0.0021 | 15.5006 | 0.0020 | 36.7362 | 0.0052 |
|          |                          | 17.3135 | 0.0022 | 15.5076 | 0.0023 | 36.7563 | 0.0056 |
|          |                          | 17.3050 | 0.0020 | 15.5055 | 0.0019 | 36.7541 | 0.0043 |
| 23091503 | Upper Høydalen           | 17.3254 | 0.0019 | 15.4999 | 0.0014 | 36.7244 | 0.0035 |
|          |                          | 17.3298 | 0.0017 | 15.5059 | 0.0013 | 36.7354 | 0.0035 |
|          |                          | 17.3378 | 0.0018 | 15.5031 | 0.0012 | 36.7342 | 0.0029 |
|          |                          | 17.3381 | 0.0016 | 15.5079 | 0.0014 | 36.7440 | 0.0036 |
|          |                          | 17.3415 | 0.0018 | 15.5059 | 0.0020 | 36.7407 | 0.0046 |
|          |                          | 17.3278 | 0.0023 | 15.5018 | 0.0018 | 36.7305 | 0.0046 |

|          |                    |         |        |         |        |         |        |
|----------|--------------------|---------|--------|---------|--------|---------|--------|
|          |                    | 17.3241 | 0.0013 | 15.5005 | 0.0013 | 36.7268 | 0.0032 |
|          |                    | 17.3277 | 0.0017 | 15.5042 | 0.0015 | 36.7379 | 0.0039 |
|          |                    | 17.3322 | 0.0012 | 15.5060 | 0.0010 | 36.7411 | 0.0025 |
|          |                    | 17.3288 | 0.0014 | 15.5063 | 0.0014 | 36.7408 | 0.0033 |
| 23091502 | Upper Høydalen     | 17.3483 | 0.0029 | 15.5052 | 0.0022 | 36.7265 | 0.0065 |
|          |                    | 17.3228 | 0.0011 | 15.5039 | 0.0012 | 36.7332 | 0.0032 |
|          |                    | 17.3212 | 0.0008 | 15.5020 | 0.0007 | 36.7280 | 0.0020 |
|          |                    | 17.3187 | 0.0013 | 15.4994 | 0.0012 | 36.7215 | 0.0029 |
|          |                    | 17.3228 | 0.0013 | 15.5022 | 0.0013 | 36.7275 | 0.0033 |
|          |                    | 17.3195 | 0.0009 | 15.5027 | 0.0009 | 36.7295 | 0.0027 |
| 05061621 | Pegmatitic granite | 17.2442 | 0.0013 | 15.5021 | 0.0014 | 36.7110 | 0.0042 |
|          |                    | 17.2469 | 0.0018 | 15.5047 | 0.0020 | 36.7128 | 0.0057 |
|          |                    | 17.2473 | 0.0020 | 15.5063 | 0.0021 | 36.7205 | 0.0063 |
|          |                    | 17.2502 | 0.0018 | 15.5096 | 0.0019 | 36.7317 | 0.0060 |
|          |                    | 17.2497 | 0.0010 | 15.5077 | 0.0011 | 36.7287 | 0.0038 |
|          |                    | 17.2596 | 0.0025 | 15.5145 | 0.0025 | 36.7508 | 0.0075 |
|          |                    | 17.2681 | 0.0046 | 15.5030 | 0.0018 | 36.7170 | 0.0060 |
|          |                    | 17.2568 | 0.0013 | 15.5062 | 0.0016 | 36.7232 | 0.0043 |
|          |                    | 17.2479 | 0.0014 | 15.4988 | 0.0018 | 36.7023 | 0.0057 |
|          |                    | 17.2513 | 0.0017 | 15.5088 | 0.0019 | 36.7312 | 0.0059 |
| 20091501 | Tørdal granite     | 17.3555 | 0.0057 | 15.5098 | 0.0054 | 36.8799 | 0.0150 |
|          |                    | 17.3370 | 0.0074 | 15.5161 | 0.0095 | 36.8336 | 0.0280 |
|          |                    | 17.3375 | 0.0085 | 15.5215 | 0.0081 | 36.8412 | 0.0230 |
|          |                    | 17.3189 | 0.0048 | 15.5055 | 0.0053 | 36.7996 | 0.0150 |
|          |                    | 17.3364 | 0.0066 | 15.5298 | 0.0064 | 36.8737 | 0.0190 |
|          |                    | 17.3090 | 0.0056 | 15.4960 | 0.0063 | 36.7666 | 0.0190 |
|          |                    | 17.3221 | 0.0060 | 15.4983 | 0.0060 | 36.7622 | 0.0190 |
|          |                    | 17.3793 | 0.0046 | 15.5311 | 0.0043 | 36.9119 | 0.0150 |
|          |                    | 17.3299 | 0.0065 | 15.5084 | 0.0068 | 36.8147 | 0.0200 |
|          |                    | 17.3550 | 0.0066 | 15.5011 | 0.0057 | 36.8408 | 0.0170 |
